# Supplementary material for: Pyrolysis of metal–organic framework (CuBTC) decorated filter paper as a low-cost and highly active catalyst for the reduction of 4-nitrophenol
Source: Royal Society of Chemistry journal article supplement (doi:10.1039/c8dt03327g), 2018-01-01
Supplement: c8dt03327g1.pdf [file c8dt03327g1.pdf]

## Supporting Information

### Pyrolysis of Metal–Organic Framework (CuBTC) decorated Filter Paper as a low-cost and highly active Catalyst for the reduction of 4-Nitrophenol

Lihua Zhi,<sup>\*a</sup> Hua Liu,<sup>a</sup> Youyuan Xu,<sup>a</sup> Dongcheng Hu,<sup>a</sup> Xiaoqiang Yao<sup>a</sup> and Jiacheng Liu<sup>\*a</sup>

<sup>a</sup>Key Laboratory of Eco-Environment-Related Polymer Materials of Ministry of Education, Key Laboratory of Polymer Materials of Gansu Province, College of Chemistry and Chemical Engineering, Northwest Normal University, Lanzhou 730070 (P.R. China).<sup>\*</sup> *Corresponding author.* Fax: +86-931-7971989; e-mail: zhilh@nwnu.edu.cn; jcliu8@nwnu.edu.cn

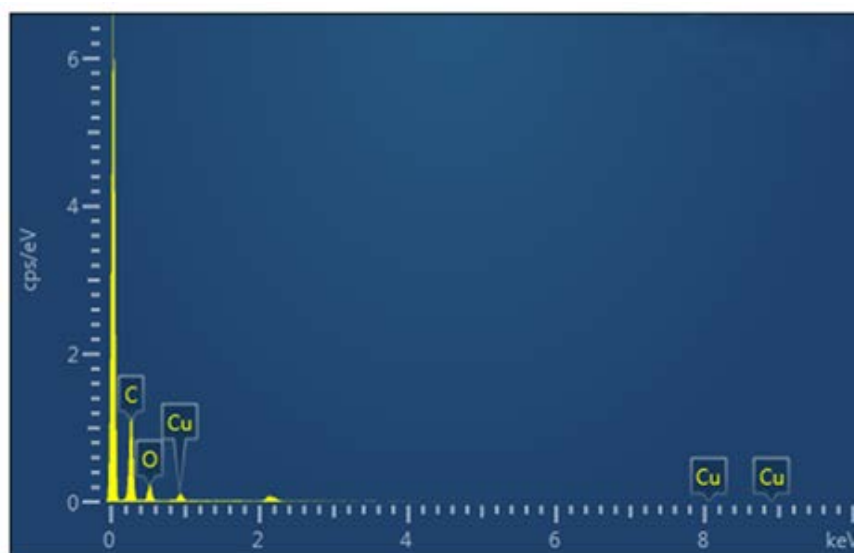

**Figure S1.** EDX data of the  $\text{Cu}_x\text{O}@C-400$ .

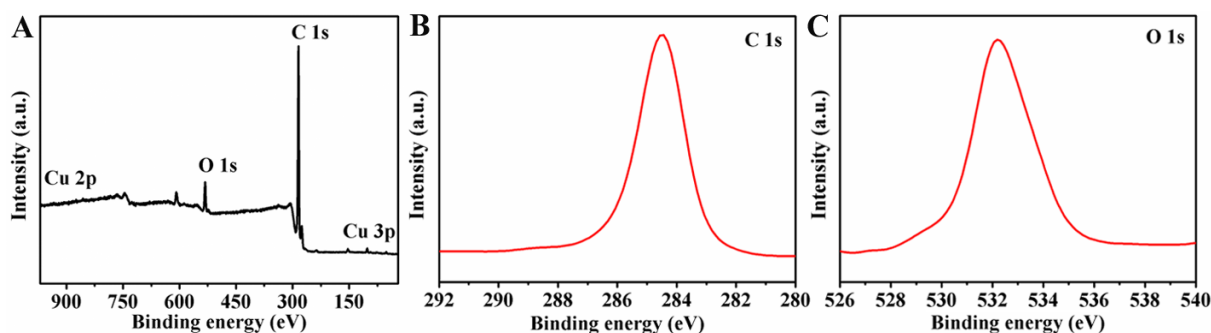

**Figure S2.** (A) XPS survey spectrum of  $\text{Cu}_x\text{O}@C-400$ . High-resolution scans for the C 1s (B) and O 1s (E) electrons of the  $\text{Cu}_x\text{O}@C-400$ .

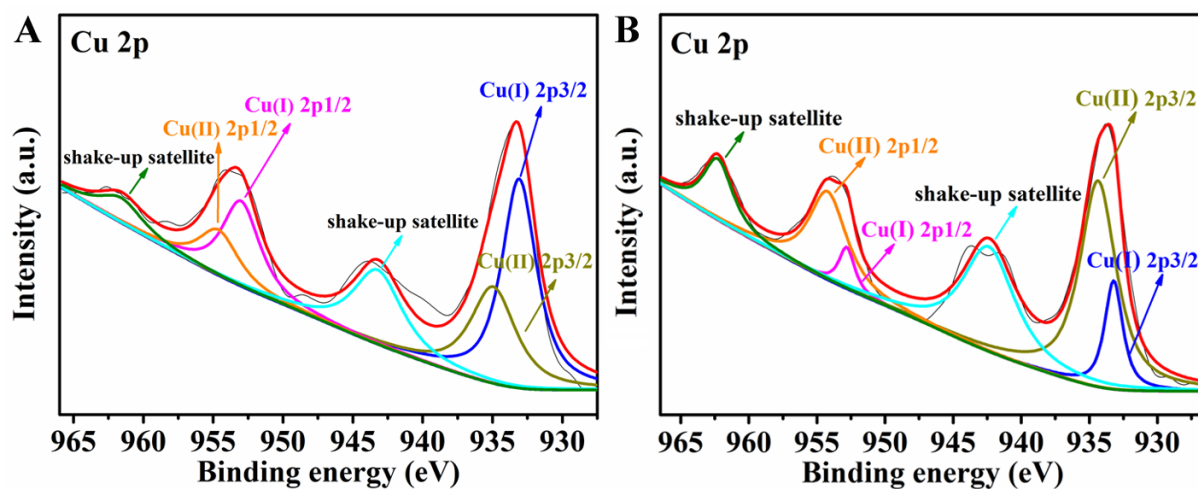

**Figure S3.** High-resolution scans for the Cu 2p electron of Cu<sub>x</sub>O@C-300 (A) and Cu<sub>x</sub>O@C-500 (B).

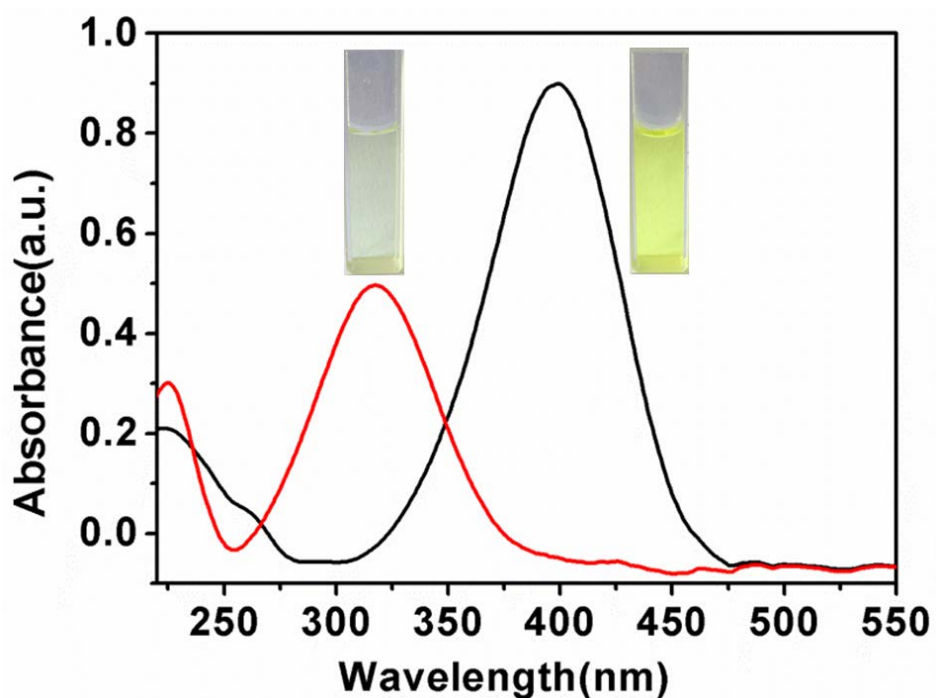

**Figure S4.** UV-vis spectroscopy of 4-NP solution before (red line) and after (black line) addition of NaBH<sub>4</sub>. Inset: color change of 4-nitrophenol solution before (left) and after (right) the addition of NaBH<sub>4</sub>.

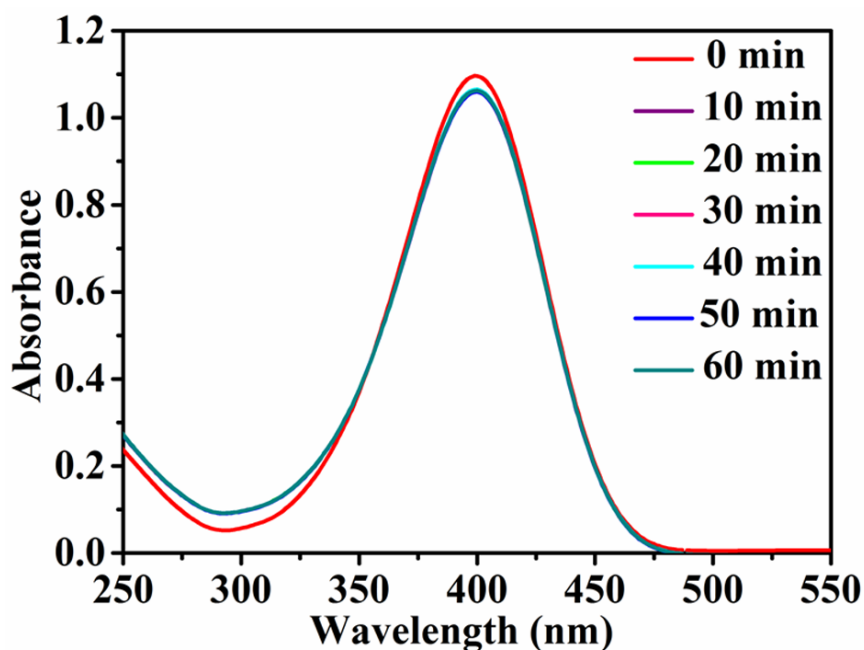

**Figure S5.** Time-dependent UV-vis spectra of the reaction solution in the absence of  $\text{Cu}_x\text{O}@C-400$ .

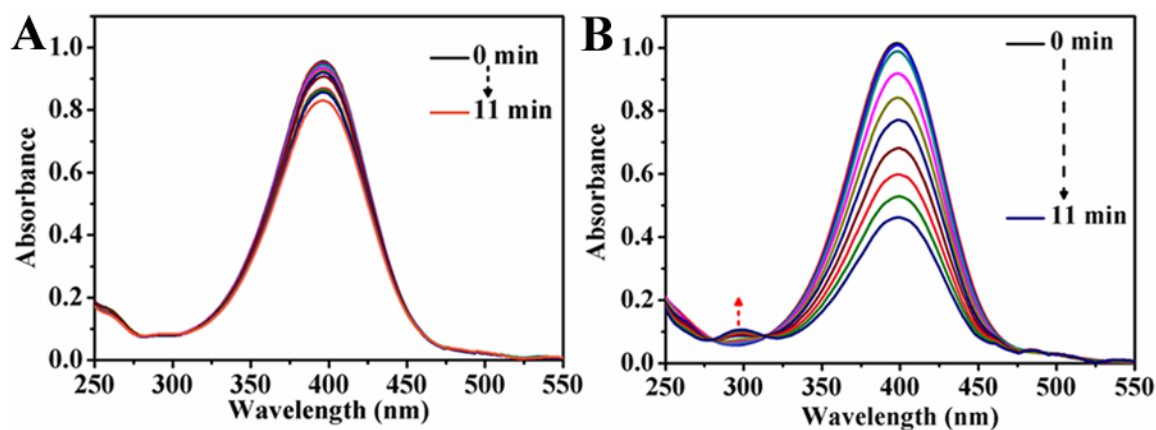

**Figure S6.** Time-dependent UV-visible spectrum for the reduction of 4-nitrophenol to 4-aminophenol in water after adding 2 mg of  $\text{Cu}_x\text{O}@C-300$  (A),  $\text{Cu}_x\text{O}@C-500$  (B). The concentration of 4-nitrophenolate was  $5.3 \mu\text{M}$ , and that of sodium borohydride was  $0.33 \text{ mM}$ .

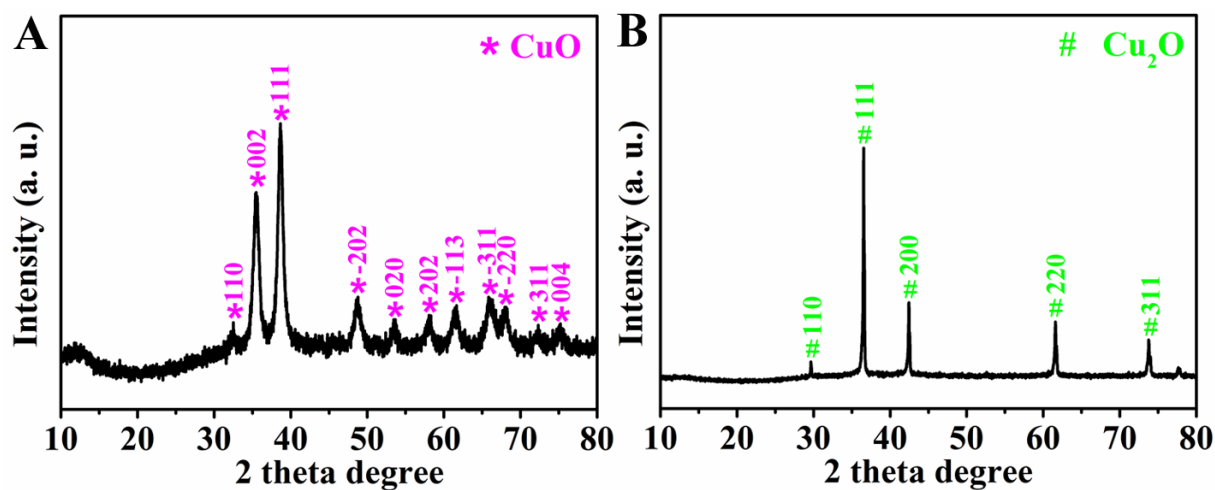

**Figure S7.** (A) XRD pattern of the CuO. (B) XRD pattern of the  $\text{Cu}_2\text{O}$ .

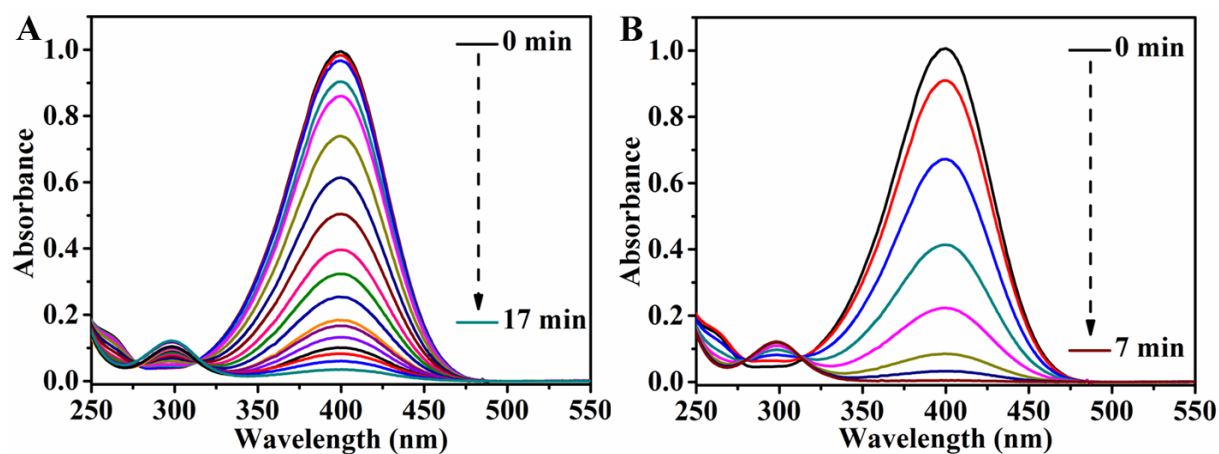

**Figure S8.** Time-dependent UV-visible spectrum for the reduction of 4-nitrophenol to 4-aminophenol in water after adding 2 mg of CuO (A) and 2 mg of  $\text{Cu}_2\text{O}$  (B). The concentration of 4-nitrophenolate was  $5.3\ \mu\text{M}$ , and that of sodium borohydride was  $0.33\ \text{mM}$ .

**Table S1.** Comparison of the catalytic activity among the state-of-art notable metal based catalysts and the catalysts synthesized in this work

| <b>catalyst</b>              | <b>4-NP : NaBH<sub>4</sub><br/>(mol / mol)</b> | <b>k<sub>app</sub> (s<sup>-1</sup>)</b> | <b>ref.</b>      |
|------------------------------|------------------------------------------------|-----------------------------------------|------------------|
| <b>Au/SiO<sub>2</sub></b>    | <b>1:100</b>                                   | <b>0.3 * 10<sup>-3</sup></b>            | <b>47</b>        |
| <b>Au@MSNs</b>               | <b>1:400</b>                                   | <b>1.6 * 10<sup>-3</sup></b>            | <b>9</b>         |
| <b>Ag/SiO<sub>2</sub></b>    | <b>1:400</b>                                   | <b>2.7 * 10<sup>-3</sup></b>            | <b>48</b>        |
| <b>CNC@PDA-AgNPs</b>         | <b>1:317</b>                                   | <b>4.3 * 10<sup>-3</sup></b>            | <b>49</b>        |
| <b>Bio-Pd</b>                | <b>1:100</b>                                   | <b>3.7 * 10<sup>-4</sup></b>            | <b>50</b>        |
| <b>CuBTC-400</b>             | <b>1:62.5</b>                                  | <b>0.52 * 10<sup>-3</sup></b>           | <b>This work</b> |
| <b>FPS-400</b>               | <b>1:62.5</b>                                  | <b>4.4 * 10<sup>-6</sup></b>            | <b>This work</b> |
| <b>Cu<sub>x</sub>O@C-300</b> | <b>1:62.5</b>                                  | <b>0.21 * 10<sup>-3</sup></b>           | <b>This work</b> |
| <b>Cu<sub>x</sub>O@C-400</b> | <b>1:62.5</b>                                  | <b>4.8 * 10<sup>-3</sup></b>            | <b>This work</b> |
| <b>Cu<sub>x</sub>O@C-500</b> | <b>1:62.5</b>                                  | <b>1.6 * 10<sup>-3</sup></b>            | <b>This work</b> |

The apparent rate constant ( $\kappa_{app}$ ) can be calculated using following equation :  $\ln(C_t/C_0) = \ln(A_t/A_0) = -\kappa_{app}t$ , where  $C_t$  is the concentration of 4-NP at time  $t$ ,  $\kappa_{app}$  is the apparent rate constant, The apparent rate constant was determined from the linear plot of  $\ln(A_t/A_0)$  versus time.
